# Supplementary material for: Synthesis and characterization of a novel spirocyclic aromatic derivative: unique roles of phenothiazine
Source: Royal Society of Chemistry journal article supplement (doi:10.1039/c3nj00635b), 2013-01-01

Supporting information for:

# Synthesis and characterization of a novel spirocyclic aromatic derivative: unique roles of phenothiazine

Hong-ji Jiang, <sup>\*a</sup> and Jian Sun <sup>a</sup>

<sup>a</sup> Key Laboratory of Organic Electronics and Information Displays, Institute of Advanced Materials,  
Nanjing University of Posts and Telecommunications, Nanjing 210023, China

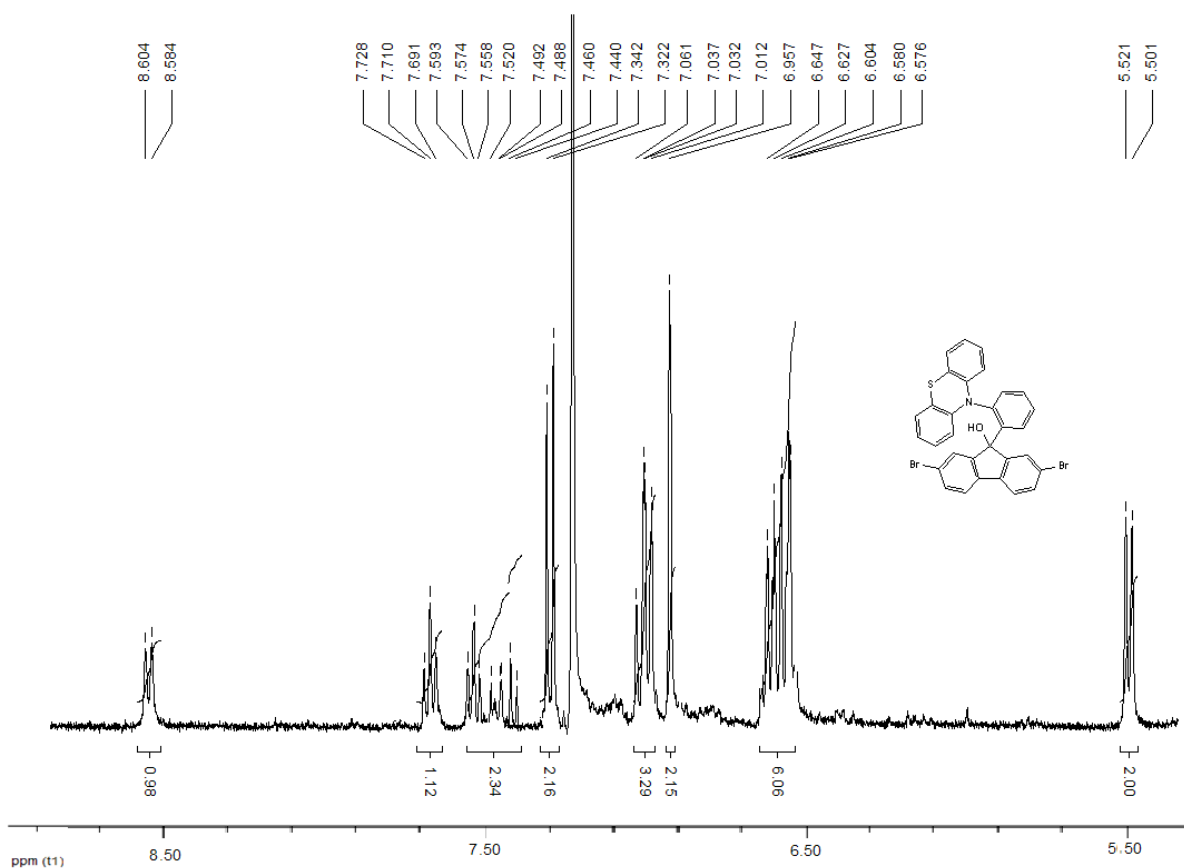

**S1.** The <sup>1</sup>H-NMR (CDCl<sub>3</sub>, 400 MHz, ppm) shift spectra of compound **SPOH**.

\* Corresponding author: H.J. Jiang(iamhjjiang@njupt.edu.cn)

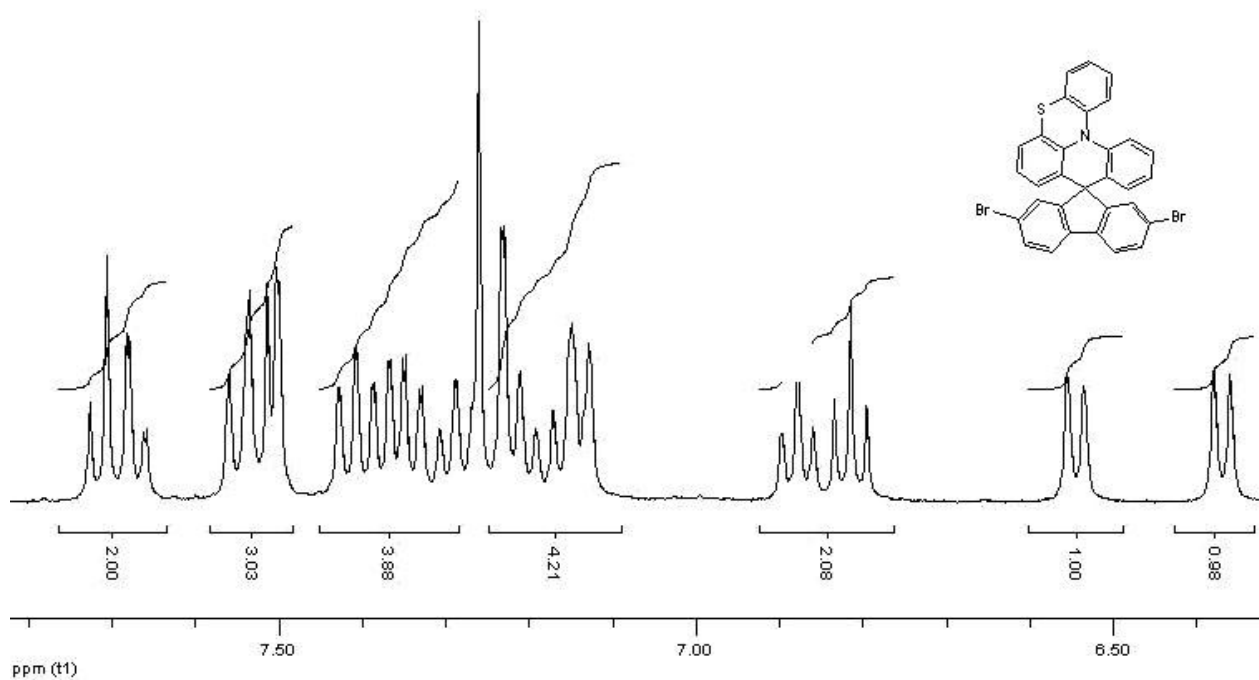

**S2.** The  $^1\text{H-NMR}$  ( $\text{CDCl}_3$ , 400 MHz, ppm) shift spectra of compound **SPIS**.

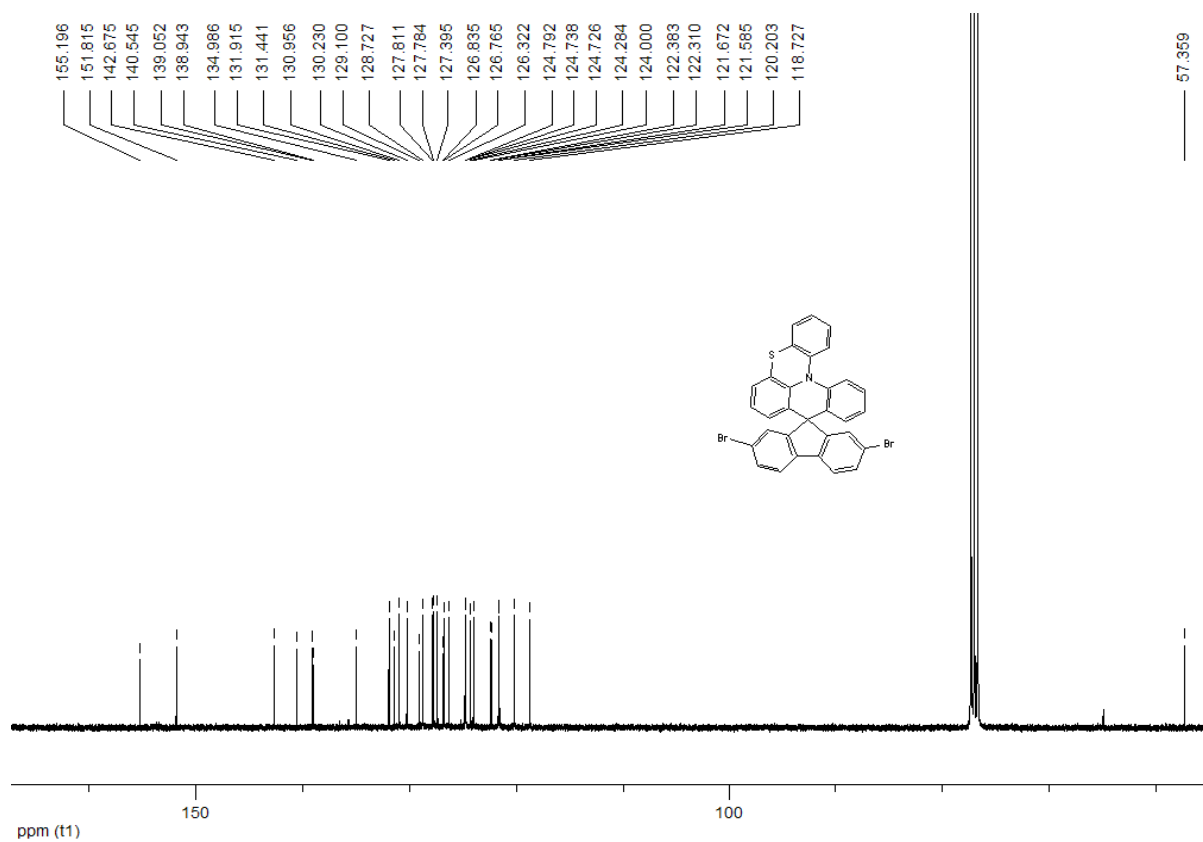

**S3.** The  $^{13}\text{C-NMR}$  ( $\text{CDCl}_3$ , 100 MHz, ppm) shift spectra of compound **SPIS**.

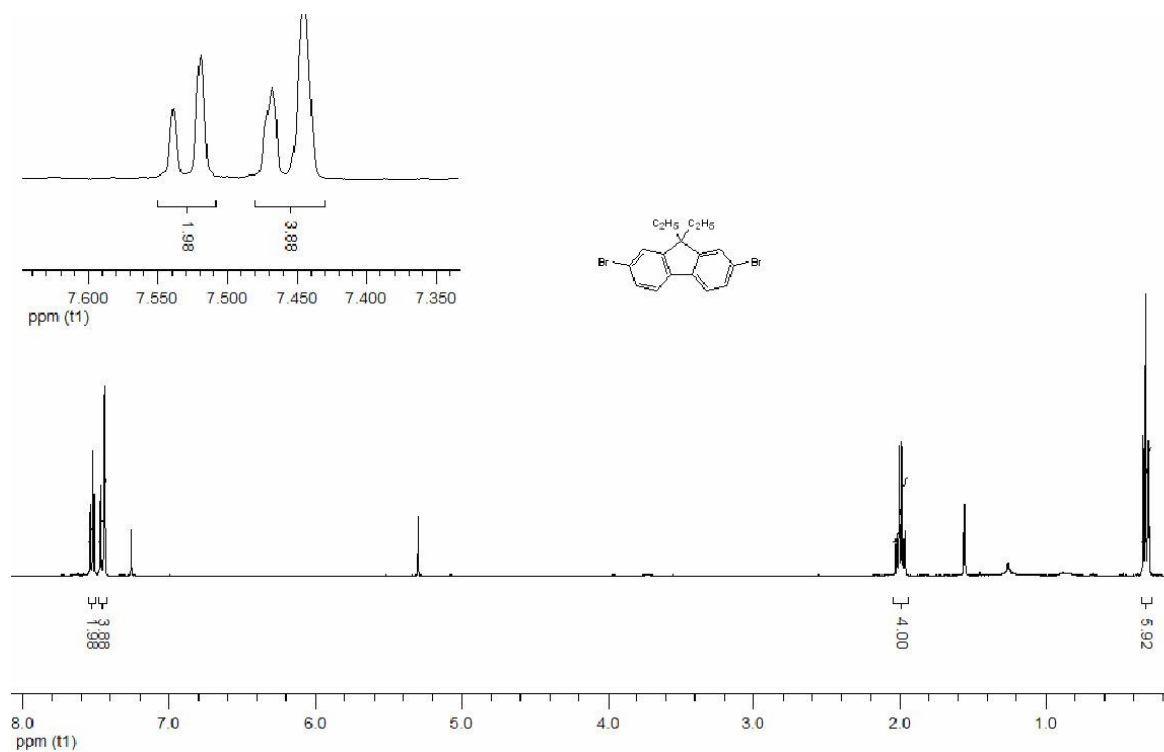

**S4.** The  $^1\text{H-NMR}$  ( $\text{CDCl}_3$ , 400 MHz, ppm) shift spectra of compound **2BrC<sub>2</sub>F**

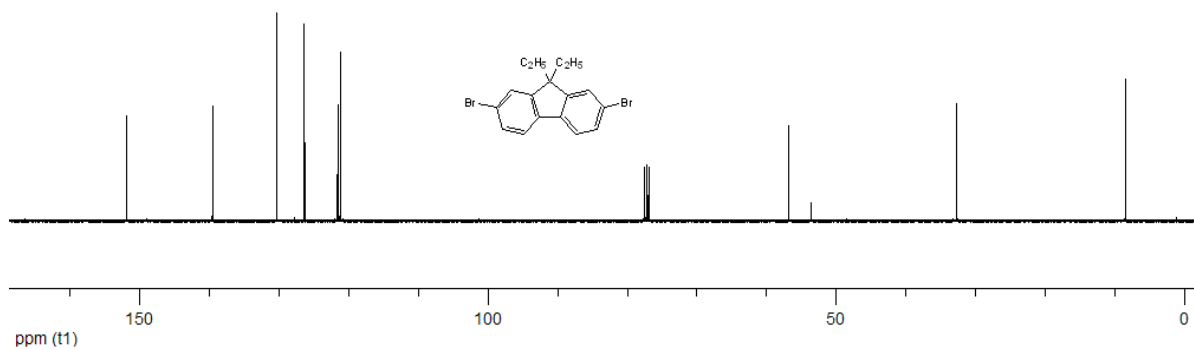

**S5.** The  $^{13}\text{C-NMR}$  ( $\text{CDCl}_3$ , 100 MHz, ppm) shift spectra of compound **2BrC<sub>2</sub>F**

D:\Data\DATA\HJ\SI\2013-6-20\LIUJIE\0\_A1\1\1Ref

Comment 1

Comment 2

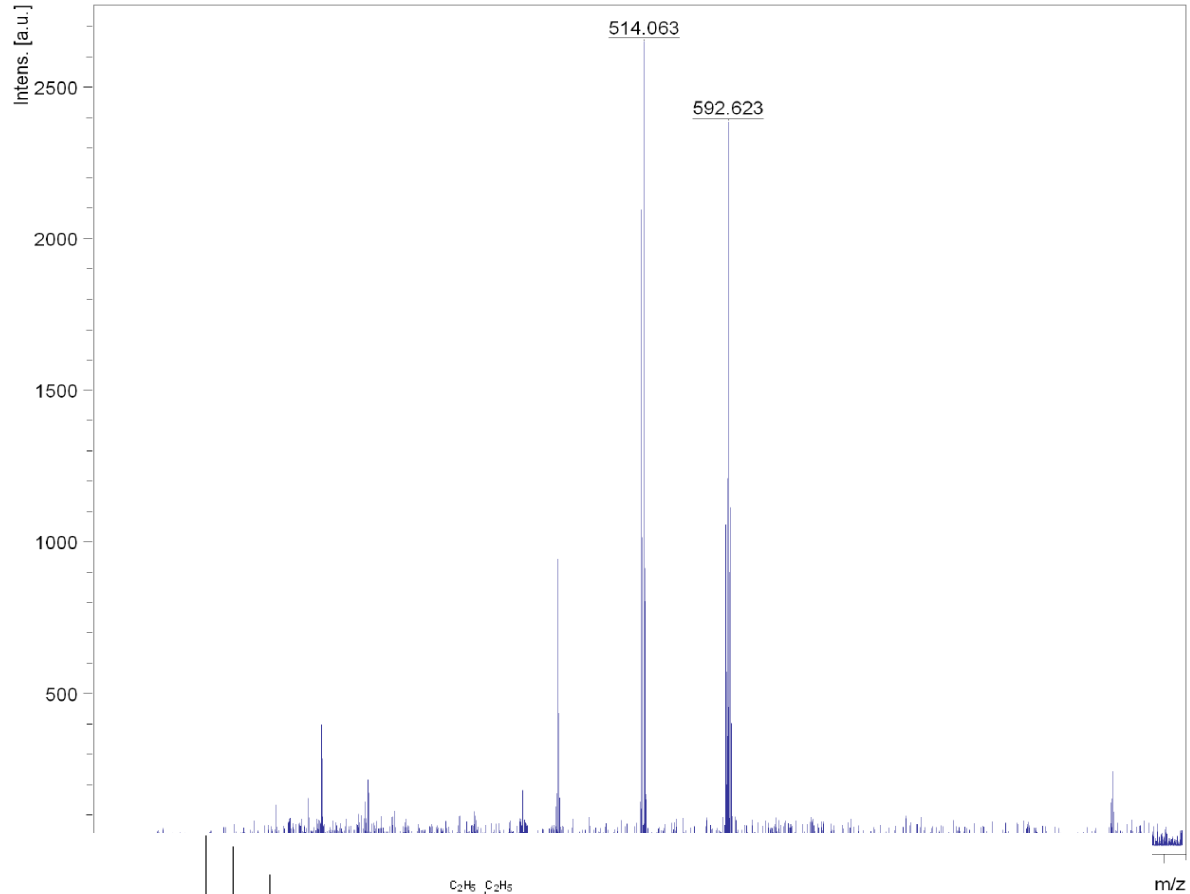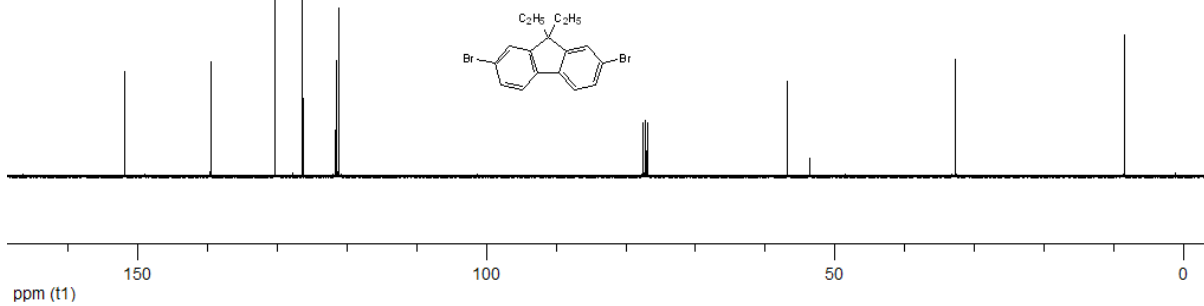

Supplement: c3nj00635b.pdf [file c3nj00635b.pdf]
